# Supplementary material for: TaPIMP2, a pathogen-induced MYB protein in wheat, contributes to host resistance to common root rot caused by Bipolaris sorokiniana
Source: PubMed Central journal article supplement (PMC5431884; doi:10.1038/s41598-017-01918-7), 2017-05-11
Supplement: 41598_2017_1918_MOESM1_ESM.pdf [file 41598_2017_1918_MOESM1_ESM.pdf]

**Title: TaPIMP2, a pathogen-induced MYB protein in wheat, contributes to host resistance to common root rot caused by *Bipolaris sorokiniana***

**Authors: Xuening Wei†, Tianlei Shan†, Yantao Hong†, Huijun Xu, Xin Liu, Zengyan Zhang\***

**Supplementary table 1** *Rhizoctonia cerealis* responses of four TaPIMP2-overexpression Yangmai 16 transgenic lines and untransformed Yangmai 16.

| Lines      | ITs (infection tyeps) | DI (disease index) |
|------------|-----------------------|--------------------|
| OE393      | 2.12                  | 42.40              |
| OE394      | 2.08                  | 41.60              |
| OE395      | 2.06                  | 41.20              |
| OE396      | 2.40                  | 48.00              |
| Yangmai 16 | 2.17                  | 43.40              |

Disease infection type (IT) of sharp eyespot was scored based on the 0-5 disease scale:

0: no symptoms observed 1: lesions appeared on the sheaths rather than stems; 2: lesions covered less than 1/2 of infected stem perimeter; 3: lesions covered 1/2-3/4 of infected stem perimeter; 4: lesions covered more than 3/4; 5: dead plant. Disease

index =  $\{(0 \times X_0 + 1 \times X_1 + 2 \times X_2 + 3 \times X_3 + 4 \times X_4 + 5 \times X_5) / [(X_0 + X_1 + X_2 + X_3 + X_4 + X_5) \times 5]\} \times 100$ ,

where  $X_0$ - $X_5$  indicated plants with IT: 0-5.

**Supplementary table 2** MBS sequences in promoters of defense-related genes, *PR2* and *PR5*, regulated by TaPIMP2.

| Gene name  | Accession no. | Site name | Position | sequences  |
|------------|---------------|-----------|----------|------------|
| <i>PR2</i> | AF112965      | MBS       | 701      | CGGTCA     |
|            |               | ACI       | 1068     | CACCCTCACC |
| <i>PR5</i> | AF442967      | ACI       | 382      | CCCACCTACC |
|            |               | W-box     | 787      | TTGACC     |

The sequence of 2500 bp upstream of ATG start codon were analyzed in PlantCARE (<http://bioinformatics.psb.ugent.be/webtools/plantcare/html/>).
